# Supplementary material for: The Novel circRNA_0022587/miR-216a-5p/PRKCE Axis Restricts Glioblastoma (GBM) Progression
Source: Research Square preprint supplement (doi:10.21203/rs.3.rs-8275622/v1), 2025-12-11
Supplement: Supplementary file 1 [file 2c0d383b9ff6a5ec46c4024e.docx]

Supplementary Table S3**.** Semi-quantitative scoring criteria for immunohistochemical staining

| **Scoring Indicator** | **Grading Standard** | **Corresponding Score** |
| --- | --- | --- |
| Cell staining intensity | No positive staining | 0 |
|  | Pale yellow | 1 |
|  | Tan | 2 |
|  | Dark brown | 3 |
| Percentage of positive cells | ≤25% | 1 |
|  | 26%–50% | 2 |
|  | 51%–75% | 3 |
|  | >75% | 4 |
