# Supplementary material for: The Novel circRNA_0022587/miR-216a-5p/PRKCE Axis Restricts Glioblastoma (GBM) Progression
Source: Research Square preprint supplement (doi:10.21203/rs.3.rs-8275622/v1), 2025-12-11
Supplement: Supplementary file 2 [file 4a26955ee9eaeff615972f25.xlsx]

## Sheet: Sheet1
circMine	RNA-seq	circBank
miR-15a-5p	miR-21-5p	miR-16-5p
miR-16-5p	miR-93-5p	miR-23a-5p
miR-23a-5p	miR-10b-5p	miR-24-3p
miR-24-3p	miR-27a-3p	miR-198
miR-31-5p	miR-10b-3p	miR-139-3p
miR-93-3p	miR-196a-5p	miR-181a-5p
miR-95-3p	miR-15b-3p	miR-214-5p
miR-198	miR-130b-3p	miR-216a-5p
miR-129-1-3p	miR-16-2-3p	miR-216a-3p
miR-139-3p	miR-296-3p	miR-219a-1-3p
miR-10b-3p	miR-23a-3p	miR-222-5p
miR-181a-5p	miR-novel-chrX_28811	miR-15b-5p
miR-181b-3p	miR-novel-chrY_29589	miR-23b-5p
miR-214-5p	miR-424-5p	miR-124-5p
miR-216a-5p	miR-novel-chr10_310	miR-125b-5p
miR-216a-3p	miR-novel-chr16_7509	miR-128-3p
miR-219a-1-3p	miR-542-3p	miR-133a-5p
miR-221-5p	miR-2115-3p	miR-133a-3p
miR-222-5p	miR-450a-1-3p	miR-143-3p
miR-200b-3p	miR-296-5p	miR-145-5p
miR-15b-5p	miR-155-5p	miR-145-5p
miR-23b-5p	miR-190b-5p	miR-125a-5p
miR-124-5p	miR-199b-3p	miR-320a-5p
miR-125b-5p	miR-199a-3p	miR-339-5p
miR-128-3p	miR-novel-chr10_253	miR-133b
miR-133a-5p	miR-182-5p	miR-424-5p
miR-133a-3p	miR-503-5p	miR-412-3p
miR-143-3p	miR-424-3p	miR-486-3p
miR-145-5p	miR-9-3p	miR-490-3p
miR-125a-5p	miR-novel-chr19_11389	miR-493-3p
miR-129-2-3p	miR-183-5p	miR-497-5p
miR-195-5p	miR-19b-3p	miR-512-5p
miR-320a-5p	miR-1246	miR-520a-5p
miR-200c-3p	miR-148a-3p	miR-526b-5p
miR-181b-2-3p	miR-615-3p	miR-525-5p
miR-339-5p	miR-217-5p	miR-450a-2-3p
miR-335-5p	miR-1299	miR-503-5p
miR-133b	miR-570-3p	miR-508-5p
miR-424-5p	miR-1268a	miR-508-5p
miR-425-5p	miR-106b-5p	miR-567
miR-429	miR-196b-5p	miR-588
miR-412-3p	miR-450b-5p	miR-589-5p
miR-486-3p	miR-374a-5p	miR-591
miR-490-3p	miR-28-5p	miR-593-3p
miR-493-3p	miR-450a-5p	miR-597-3p
miR-497-5p	miR-503-3p	miR-601
miR-512-5p	miR-96-5p	miR-615-5p
miR-520e-5p	miR-130b-5p	miR-615-3p
miR-520a-5p	miR-1262	miR-618
miR-526b-5p	miR-181b-3p	miR-619-3p
miR-525-5p	miR-335-3p	miR-642a-5p
miR-450a-2-3p	miR-450a-2-3p	miR-643
miR-503-5p	miR-92b-5p	miR-646
miR-505-3p	miR-4636	miR-656-5p
miR-508-5p	miR-19a-3p	miR-658
miR-556-5p	miR-542-5p	miR-1264
miR-567	miR-627-5p	miR-1323
miR-570-3p	miR-27a-5p	miR-449c-3p
miR-588	miR-335-5p	miR-766-3p
miR-589-5p	miR-25-5p	miR-761
miR-591	miR-320c	miR-765
miR-593-3p	miR-147b-3p	miR-675-3p
miR-597-3p	miR-891a-5p	miR-298
miR-615-5p	miR-2115-5p	miR-541-3p
miR-615-3p	miR-10a-5p	miR-921
miR-618	miR-216a-5p	miR-922
miR-619-3p	miR-493-5p	miR-936
miR-620	miR-novel-chr2_16806	miR-1226-3p
miR-642a-5p	miR-181b-2-3p	miR-1238-5p
miR-643	miR-21-3p	miR-1200
miR-646		miR-1202
miR-656-5p		miR-1207-5p
miR-658		miR-1207-5p
miR-421		miR-1207-3p
miR-1264		miR-1302
miR-1323		miR-1251-5p
miR-449c-3p		miR-548o-3p
miR-766-3p		miR-1266-5p
miR-761		miR-1912-3p
miR-765		miR-1914-3p
miR-675-3P		miR-1915-5p
miR-298		miR-1972
miR-892a		miR-2110
miR-541-3p		miR-2115-3p
miR-887-5p		miR-2117
miR-921		miR-711
miR-922		miR-548s
miR-936		miR-3127-3p
miR-1226-3p		miR-3130-3p
miR-1229-3p		miR-544b
miR-1238-5p		miR-3137
miR-1200		miR-3142
miR-1202		miR-3147
miR-1207-5p		miR-3154
miR-1207-3p		miR-3154
miR-1290		miR-3157-5p
miR-1302		miR-3173-3p
miR-1303		miR-3183
miR-1251-5p		miR-3185
miR-548o-3p		miR-3198
miR-1266-5p		miR-3202
miR-1270		miR-3202
miR-1252-5p		miR-4324
miR-513b-3p		miR-4324
miR-1324		miR-4259
miR-1912-3p		miR-4254
miR-1914-3p		miR-2355-5p
miR-1915-5p		miR-4270
miR-1972		miR-4329
miR-2110		miR-3605-5p
miR-2115-3p		miR-3610
miR-2117		miR-3614-3p
miR-711		miR-3614-3p
miR-3120-3p		miR-3619-5p
miR-548s		miR-3619-5p
miR-3127-3p		miR-3661
miR-3128		miR-3667-5p
miR-3130-3p		miR-3681-3p
miR-544b		miR-3934-3p
miR-3137		miR-3936
miR-3142		miR-4420
miR-3145-3p		miR-4421
miR-3147		miR-4425
miR-3149		miR-4437
miR-3154		miR-4441
miR-3157-5p		miR-4451
miR-3166		miR-4462
miR-3173-3p		miR-4465
miR-3183		miR-4476
miR-3185		miR-4476
miR-3198		miR-3689f
miR-3202		miR-4487
miR-4324		miR-4496
miR-4259		miR-4514
miR-4251		miR-4516
miR-4254		miR-4524a-3p
miR-4327		miR-4632-5p
miR-2355-5p		miR-4649-3p
miR-4270		miR-4674
miR-4276		miR-4686
miR-4329		miR-1343-3p
miR-3605-5p		miR-4689
miR-3610		miR-4691-3p
miR-3614-3p		miR-4692
miR-3618		miR-4698
miR-3619-5p		miR-4701-5p
miR-3661		miR-4706
miR-3664-3p		miR-4709-3p
miR-3667-5p		miR-4713-5p
miR-3671		miR-4728-5p
miR-3681-3p		miR-4732-5p
miR-3689a-5p		miR-4732-5p
miR-3689b-5p		miR-4745-5p
miR-3919		miR-4756-5p
miR-3934-3p		miR-4758-5p
miR-3936		miR-4763-3p
miR-3942-3p		miR-4783-3p
miR-4420		miR-4785
miR-4421		miR-4793-5p
miR-4434		miR-4793-3p
miR-4437		miR-5004-3p
miR-4441		miR-5008-5p
miR-4451		miR-5010-3p
miR-4462		miR-5088-3p
miR-4465		miR-5092
miR-4476		miR-5195-3p
miR-3689e		miR-4524b-3p
miR-3689f		miR-5581-3p
miR-4487		miR-5582-3p
miR-4496		miR-1295b-5p
miR-4514		miR-5693
miR-4516		miR-5699-3p
miR-4524a-3p		miR-5703
miR-4531		miR-5703
miR-4632-5p		miR-5704
miR-4649-3p		miR-6071
miR-4653-3p		miR-6088
miR-4674		miR-6500-5p
miR-4686		miR-6501-3p
miR-1343-3p		miR-6510-5p
miR-4689		miR-6722-3p
miR-4691-3p		miR-6729-3p
miR-4692		miR-6733-3p
miR-4693-5p		miR-6735-5p
miR-4698		miR-6736-5p
miR-4701-5p		miR-6744-5p
miR-4703-3p		miR-6751-5p
miR-4706		miR-6754-5p
miR-4709-3p		miR-6754-3p
miR-4711-5p		miR-6760-5p
miR-4713-5p		miR-6767-5p
miR-4728-5p		miR-6776-3p
miR-4732-5p		miR-6783-3p
miR-4745-5p		miR-6784-3p
miR-4756-5p		miR-6787-5p
miR-4758-5p		miR-6808-5p
miR-4763-3p		miR-6809-5p
miR-4770		miR-6813-3p
miR-4436b-3p		miR-6826-3p
miR-4783-3p		miR-6831-5p
miR-4785		miR-6832-5p
miR-1245b-5p		miR-6834-3p
miR-4793-5p		miR-6780b-5p
miR-4793-3p		miR-6837-3p
miR-5004-3p		miR-6838-5p
miR-5008-5p		miR-6847-5p
miR-5010-3p		miR-6858-5p
miR-5088-3p		miR-6862-3p
miR-5092		miR-6862-3p
miR-5094		miR-6864-5p
miR-5195-3p		miR-6868-5p
miR-4524b-3p		miR-6870-3p
miR-5581-3p		miR-6870-3p
miR-5582-3p		miR-6873-5p
miR-1295b-5p		miR-6876-5p
miR-5693		miR-6876-5p
miR-5699-3p		miR-6879-5p
miR-5703		miR-6881-5p
miR-5704		miR-6892-3p
miR-6071		miR-6893-5p
miR-6088		miR-6893-5p
miR-6500-5p		miR-7110-3p
miR-6501-3p		miR-7113-5p
miR-6510-5p		miR-7113-5p
miR-6722-3p		miR-7150
miR-6729-3p		miR-7151-5p
miR-6733-3p		miR-7156-3p
miR-6735-5p		miR-7161-3p
miR-6736-5p		miR-7843-5p
miR-6744-5p		miR-7847-3p
miR-6751-5p		miR-8073
miR-6754-5p		miR-10398-3p
miR-6760-5p		miR-11181-3p
miR-6767-5p		miR-9851-3p
miR-6776-3p		miR-12115
miR-6783-3p		miR-12117
miR-6784-3p		miR-12120
miR-6787-5p		miR-12128
miR-6802-3p		miR-105-3p
miR-6808-5p		miR-198
miR-6809-5p		miR-214-5p
miR-6813-3p		miR-425-5p
miR-6818-5p		miR-486-3p
miR-6826-3p		miR-601
miR-6831-5p		miR-646
miR-6832-5p		miR-1972
miR-6834-3p		miR-3154
miR-6780b-5p		miR-3202
miR-6837-3p		miR-4259
miR-6838-5p		miR-4421
miR-6844		miR-4425
miR-6847-5p		miR-4462
miR-6858-5p		miR-4476
miR-6862-3p		miR-4632-5p
miR-6864-5p		miR-4728-5p
miR-6868-5p		miR-6514-3p
miR-6870-3p		miR-6735-5p
miR-6873-5p		miR-6744-5p
miR-6876-5p		miR-6748-3p
miR-6879-5p		miR-6751-5p
miR-6881-5p		miR-6876-5p
miR-6892-3p		miR-6879-5p
miR-6893-5p		miR-6881-5p
miR-7110-3p		miR-7113-5p
miR-7113-5p		miR-7843-5p
miR-7150
miR-7151-5p
miR-7156-3p
miR-7161-3p
miR-7843-5p
miR-7843-3p
miR-7847-3p
miR-8073
miR-8086
miR-10398-3p
miR-10524-5p
miR-11181-3p
miR-9851-3p
miR-12115
miR-12117
miR-12120
miR-12128
