# Supplementary material for: The Novel circRNA_0022587/miR-216a-5p/PRKCE Axis Restricts Glioblastoma (GBM) Progression
Source: Research Square preprint supplement (doi:10.21203/rs.3.rs-8275622/v1), 2025-12-11
Supplement: Supplementary file 3 [file 6d6d9dfd197d30f91b79abb6.docx]

Supplementary Table S1. The sequences of oligonucleotides and qPCR primers.

| **Target** | **Sequence (5' to 3')** |
| --- | --- |
| **qPCR primers sequence** |  |
| GAPDH-F | AGAAGGCTGGGGCTCATTTG |
| GAPDH-R | GCAGGAGGCATTGCTGATGAT |
| U6-F | CTCGCTTCGGCAGCACA |
| U6-R | AACGCTTCACGAATTTGCGT |
| circRNA_0022587-F | CAGCTGATGCTCTTCACCCTG |
| circRNA_0022587-R | CAGAATGACACGGATGCCTGTC |
| miR-216a-5p-F | AACACGTGTAATCTCAGCTGGC |
| Universal reverse primer | CAGCCACAAAAGAGCACAAT |
| PRKCE-F | GACTGCACAATGACAGAGAAGAG |
| PRKCE-R | GAAGCAGCAGTAGAGTTGGGTAA |
| linear SLC3A2-F | CACTGGGACCAGAATGAGC |
| linear SLC3A2-R | GCTCCAGTTTCAGGCGTTC |
| **FISH probe sequence** |  |
| circRNA_0022587 | GCCCTTCCTGGACAGGCATCCGTGTCATTC |
| miRNA-216a-5p | AGCCCAAAAGGAGAATTCTTTG |
| PRKCE mRNA | CTTGTGGCCGTIGACCTGATGGACCCTGCG |
| **RNA-pull down probe sequence** |  |
| miR-216a-5p | UAAUCUCAGCUGGCAACUGUGA-biotin |
| miR-216a-5p NC | UUUGUACUACACAAAAGUACUG-biotin |
| **miRNA sequence** |  |
| miR-216a-5p minincs-sense | UAAUCUCAGCUGGCAACUGUGA |
| miR-216a-5p minincs NC-sense | UUUGUACUACACAAAAGUACUG |
