# Supplementary material for: The Novel circRNA_0022587/miR-216a-5p/PRKCE Axis Restricts Glioblastoma (GBM) Progression
Source: Research Square preprint supplement (doi:10.21203/rs.3.rs-8275622/v1), 2025-12-11
Supplement: Supplementary file 4 [file 8e9d4a006971aa1f45434ddf.xlsx]

## Sheet: Sheet1
miRDB	startBase	targetScan8.0	RNA-seq
DMXL2	CCNL2	TMEM161B	EIF4E3
TMEM161B	CCNL2	NGFRAP1	FCHO1
BOD1L1	EPHA2	BMP10	AIFM3
HOOK1	EMC1	RLTPR	OTUD7A
KLF9	PUM1	PROKR2	ROGDI
ZNF652	STK40	GEMIN6	PLCH2
ZMYND11	MYCBP	HNF4G	TSPYL5
HACD3	PPT1	CDC26	ARRB1
ZC3H4	GPBP1L1	TCTN1	AATK
NUFIP1	GPBP1L1	CCDC43	PDZD7
CADM2	EFCAB14	DKFZP779J2370	KCNC3
UPRT	EFCAB14	RANBP10	PTGDS
MLLT3	EPS15	SERBP1	FGFR2
DEPDC1	JUN	HOOK1	NPAS4
PHF20L1	SERBP1	HS3ST3B1	PAIP2B
RC3H1	SERBP1	SHOC2	CATSPER2
ZFYVE28	SERBP1	C8orf58	MOBP
CMPK1	SERBP1	UBE2V2	LCN12
BEX3	GNG12	ACOX1	CCSER1
AFAP1L2	GNG12	TAL2	RAB40B
CNTNAP3B	GNG12	ZFYVE28	HPSE2
MST1L	GNG12	CLDN12	CES4A
MSL3	TTLL7	LPP	RAB11FIP4
CUX2	TTLL7	RP11-47I22.3	STRC
CSK	TTLL7	WDR31	VWA5B2
SSX2IP	TTLL7	TPT1	SLC6A15
SGCD	SSX2IP	TMEM255A	EGR4
ZBTB2	ZNF644	NHLH2	OSBP2
TMEM255A	TGFBR3	DCAF12	GRM3
ARMT1	DBT	TMEM91	ERMN
CCNJ	DBT	KIAA0101	CPNE9
SLC16A7	DBT	AQP2	ANKRD34C
RANBP10	DBT	CLK4	MBP
PTHLH	DBT	CSK	GJC2
BMP10	DBT	TCTE1	DNAJC6
HTR2C	DBT	RAB11A	NCOA7
ZNF528	DBT	AFP	PAK1
USH2A	SORT1	NSUN6	LDB3
PELO	SORT1	BOD1L1	SAMD12
RBM26	SORT1	YBX1	FAM178B
UTY	SORT1	CHAF1B	GOLGA7B
SORBS2	LRIF1	C11orf57	SOWAHA
JAK2	RSBN1	EPHA5	TRPC5
TMSB4Y	RSBN1	ZBTB2	RIMS3
BMPR1A	SIKE1	COL9A1	IDI1
KATNAL2	SIKE1	CDK8	CDS1
LURAP1L	PEX11B	NAA50	CRY2
CDH6	TXNIP	ZFP69B	MTURN
NSUN6	PRKAB2	BHLHB9	APBB1
CHMP1B	PRKAB2	CAPN5	OGDHL
MYLK4	PRKAB2	HRK	TMEM125
EML4	OTUD7B	TM9SF3	KCNK12
ARMCX5	OTUD7B	NEUROG2	PYGM
CCDC28A	OTUD7B	BLOC1S5	PLP1
GINS1	OTUD7B	SPATA2	ELAPOR2
DCP1B	GOLPH3L	KIAA1468	NYAP2
ARID1A	THEM4	MSL3	EPHA8
FAM135B	THEM4	ZNF423	MCF2L
IKBIP	GATAD2B	DKFZP434H0512	MAP3K9
NAP1L1	GATAD2B	PAK2	CARMIL2
POC1B	GATAD2B	DLX2	ALOXE3
DEPDC4	SLC39A1	DUSP10	SRCIN1
ZNF713	AL358472.7	GPBP1	HRH3
CAPZA2	ADAR	TGFBR2	CKMT1A
EMSY	ASH1L	C5orf24	ZFYVE28
AMMECR1L	ASH1L	IQCH	TPPP
CAV2	ASH1L	TNFAIP8L1	RASGRF1
MACO1	ASH1L	SEPT7	VIPR1
SERF2	ASH1L	ZFAND6	CARNS1
HARS2	KHDC4	UPB1	ARHGAP44
FGFR1OP2	CCT3	ZFP91	FBXL15
DIXDC1	CCT3	SLC16A7	MAPK8IP2
ZBTB7A	CCT3	VPS35	PRRT1
TSPAN2	MEF2D	HLF	SEMA4D
CLDN12	MEF2D	PAX9	NDST3
PLEKHA5	MEF2D	AKT1S1	RELL2
NHLH2	HDGF	CTH	HHATL
SHOC2	TMCO1	ITCH	PRCD
CFL2	KIFAP3	CYFIP1	ARPP21
CAPN7	RC3H1	PRDM6	KRT86
PLRG1	RC3H1	NTNG1	CDKL2
PPAT	RC3H1	SV2B	CBX7
TRMT9B	RC3H1	PRKCE	TMEM151A
SPEF2	ABL2	RARB	RAPGEF5
PQLC3	ABL2	MITF	BTBD8
UNC13C	ABL2	CLVS2	TMEM151B
UBE2V2	ABL2	NIPBL	PPFIA3
TMIGD1	ABL2	JAK2	GDF10
HNF4G	TOR1AIP2	CD6	HOOK1
FDFT1	STX6	MEF2D	SMIM10L2B
PROKR2	ARPC5	HNRNPDL	PAK6
ORC4	ZBTB41	TEAD1	BOK
ST8SIA2	ZBTB41	SNX24	IPCEF1
ATP1B3	ZBTB41	RER1	CYP26B1
CDK14	ADIPOR1	OLIG3	ANXA3
JMY	NUCKS1	METAP1	SIDT1
TRIAP1	NUCKS1	KRT80	TMEM88B
IKZF2	YOD1	C7orf43	MTUS2
AIG1	YOD1	BCL10	SEPTIN4
ASTN2	YOD1	SMAD7	SYNGR1
NUP155	LPGAT1	PTCHD1	ANO4
NETO1	ANGEL2	RAP2B	FAM95C
APOOL	ANGEL2	KLF12	B3GNT4
GATAD2B	ENAH	NIPSNAP3B	ADAM11
RGS6	ENAH	TCERG1L	SYT9
C8orf58	ENAH	BAHD1	ZNF540
PPP4R2	ENAH	HTT	PRSS3
NPAS2	SDE2	TNFRSF11A	GLIS1
ZNF649	SDE2	ZC3H4	PDZD4
ARMC5	SDE2	ELAVL2	SPX
PPM1B	LIN9	GPBP1L1	CLCA4
ELF1	LIN9	JHDM1D	PELI3
MBD4	PARP1	LMOD2	DUSP8
PI15	C1orf198	GLTSCR1L	MOG
AGO1	EXOC8	FAM134A	CHRNB2
C1GALT1	EXOC8	GPR160	CPEB1
RS1	EGLN1	ZNF521	JAKMIP3
FMNL1	AL445524.2	TMTC1	KIAA0513
CLDN16	EGLN1	FRRS1L	ACP7
ZCCHC24	AL445524.2	CAAP1	SNCA
PAK1	EGLN1	SRR	SRRM3
CLASP1	AL445524.2	BAZ2A	CBFA2T3
EGR3	IRF2BP2	APPL1	DLG2
ZNF653	IRF2BP2	NR5A2	SCN1B
ZBTB5	TOMM20	BMPR1A	KBTBD11
NEO1	GNG4	SLC30A4	NCDN
TCEAL6	OPN3	CDK14	ZNF365
OTUD4	OPN3	CXXC4	AGTPBP1
MEGF10	CHML	BCL9	SPTBN4
ADIPOR1	CHML	CPEB4	CDK5R2
S100Z	CHML	F11R	AK7
SLC1A2	ADSS2	CSNK1A1	PDIA2
CAMK2G	KCNAB2	CELF2	ADCYAP1
COL9A1	KIF1B	SP4	NAPB
NOM1	KIF1B	L3MBTL4	DLGAP3
WDR31	KIF1B	CADM2	KLK10
C9orf170	KIF1B	PNRC1	GPR62
EDIL3	PLOD1	CGGBP1	REPS2
STX6	PLOD1	CUL4A	STXBP1
DBT	MRTO4	DIO2	GARNL3
E2F6	MRTO4	CSMD3	CABP1
CD6	CLIC4	RNF138	FBXO41
CPEB4	CLIC4	ATXN7L3	GABRG1
AKAIN1	CLIC4	MCC	ITIH3
FZD5	PDIK1L	WT1	TLCD4
ZBTB4	PDIK1L	XIAP	KCNK3
ABHD11	PDIK1L	FRK	CPEB3
RPF2	ARID1A	PPARGC1B	NEURL1
XPNPEP3	SFN	CAPN6	RAB3A
PUS10	STX12	FZD4	CAPN13
METTL14	PPP1R8	MANEA	RAI2
LYPLAL1	KHDRBS1	EPT1	STX1B
NAA15	RBBP4	ETF1	VAMP2
AADAT	S100PBP	UBE2D4	CYP17A1
GANC	ZMYM1	BOD1L2	NKX6-2
PRH1-TAS2R14	MACF1	ZFC3H1	MTMR7
STK17B	MACF1	RNF169	LHPP
ZFC3H1	MACF1	CSNK2A1	NRXN3
TRPS1	CAP1	SMPD3	ADRA2C
BRI3	MMACHC	CHRNA7	RIMKLA
ARMC9	MMACHC	MAL2	PPP2R2C
TGFBR2	CMPK1	HTR2C	PLA1A
NABP1	CMPK1	LIN28B	ABCG4
ITPR2	CMPK1	XKR4	ALDH2
VPS26A	CMPK1	MYLIP	RALYL
SNCA	CMPK1	TMEM131	ATL1
PYROXD1	SCP2	CHMP1B	RAPGEF4
MAGI2	SCP2	KDM3A	MICAL2
NIPBL	NFIA	PTEN	HIPK4
DCAF7	NFIA	FBXO33	ABCA2
BMPR2	NFIA	HLTF	JPH3
ZNF805	CTH	NCOA1	DLG4
SLC26A7	CTH	PRPF38B	TPRG1L
TMED2	CTH	ZNF207	OR2L2
DENND1B	CTH	ARHGAP26	MICU3
AUTS2	MIGA1	EPC1	RBM11
TMEM199	HS2ST1	GOLGA7B	GOT1
LCOR	HS2ST1	PTP4A1	ATP6V1G2
UNC80	LRRC8B	OLIG2	TRPV6
MBP	CDC7	RPF2	DBNDD2
TMEM237	PRPF38B	SSX2IP	CPAMD8
C4orf19	PRPF38B	RP2	PLCH1
WIPF3	STXBP3	PLAA	SPOCK1
PPARGC1B	STXBP3	HMGB1	KCNAB2
VPS35	GPSM2	NLGN1	PPP3CB
CXXC4	HIPK1	ITPR2	GFOD1
RBM7	HIPK1	SDAD1	PPP1R16B
PCYT1A	HIPK1	MAPRE2	SHANK3
ICMT	HIPK1	TIMM44	IL1RL1
DDHD2	GPR89A	CALR	SNAI3
KIAA2013	BCL9	RAD51L3-RFFL	CPLX2
RP2	BCL9	PHAX	RHBDL1
TBC1D15	GPR89B	TTC9	MAP7
ZNF417	GPR89B	AMD1	BICDL1
CCDC43	GABPB2	ANKFY1	KIF6
SORBS1	GABPB2	BCAT1	KCNQ2
DPT	GABPB2	SOCS5	THPO
GFM1	GABPB2	CUX2	XK
MINAR1	GABPB2	MYBBP1A	OPALIN
FGF2	GABPB2	ATP8B1	MUC6
ZNF148	PEA15	DCUN1D1	TF
BCL9	ATF6	TMEM55A	ANKRD18B
CNTLN	ATF6	DTNA	SLC12A5
ZBTB10	ATF6	NAA15	STX1A
TUBB	ATF6	KLHL3	RBFOX1
PSME1	POU2F1	CLYBL	KLC2
SPTBN1	POU2F1	ZEB1	VIT
FAM19A2	POU2F1	MLLT3	RUNDC3B
ATP6V1A	POU2F1	ZNF234	ABCA9
RER1	MPZL1	TLR4	KCNT1
POTEA	MPZL1	RFFL	FUT7
CSGALNACT1	MPZL1	MICALCL	SEC14L5
GNG2	MPZL1	SLC24A4	SNCG
TIPRL	DCAF6	KIAA2018	PNMA3
TMED5	TIPRL	GRIN2B	TGFBR3L
PDK1	PRDX6	STEAP3	DAO
ZNF772	PRDX6	GXYLT2	SPRYD3
AQP4	XPR1	MAGI2	MYOM2
ZNF234	LAMC1	SLC31A1	KCNJ9
CCDC71L	RGL1	AGO1	FN3K
LOC100130451	RGL1	PLXNA1	DOC2A
PURB	RGL1	EVX2	ZNF483
RETREG2	CDC73	FOXD3	RGS7
BCAT1	CDC73	SF3B3	GRM2
TMEM91	NR5A2	IMPAD1	SNRPN
ERI2	NR5A2	UACA	CASKIN1
SLC13A1	NR5A2	DEPDC1	ZFP57
CNOT4	ATP2B4	CD93	PHACTR1
PAPOLG	MDM4	KDM6B	SCRT1
FAM114A2	MDM4	BCL11B	CYP4X1
AGBL2	SERTAD4	PARP8	CA11
DAZAP1	DTL	PDK3	SLIT3
RAB18	PROX1	ZNF292	SLC25A22
AGPAT5	PROX1	CAMK1D	KIF12
OXGR1	PROX1	IDE	APLP1
DCUN1D5	MAP3K21	GABRA1	ANKRD29
GFRA1	MAP3K21	IL36RN	KANK4
FAM45A	GPR137B	ERC1	MYRF
EIF1AX	DESI2	ZNF24	PKP4
RSBN1	DESI2	AJUBA	NPM2
MTMR3	IDI1	PDCD6IP	KCNJ12
XIAP	IDI1	NNT	CAMKK1
NAA16	IDI1	ACACB	ASPDH
EEF1A1	C1QL3	FBXO47	SPTBN2
C21orf91	RSU1	ZNF652	NSF
NCKAP1	RSU1	SIKE1	GJB1
TMX3	RSU1	C4orf32	KRT222
RRM1	RSU1	TAOK1	RPS6KA5
GLO1	ARHGAP12	PRKCA	HTR5A
GRAMD1C	ARHGAP12	CORO2A	SYT4
LPP	EPC1	RIMS1	SPTB
NR3C1	NRP1	GINS2	ARHGEF37
CDC26	NRP1	MMP16	SFN
GPI	NRP1	PEX13	NAP1L3
KHDRBS1	CCDC6	SIPA1L3	IQSEC3
SNAP29	CCDC6	TAF5L	NECTIN1
GPR161	DNAJB12	KIF21B	SLC1A6
OTULIN	MRPS16	CBL	ANKRD18A
UACA	ANXA11	PTPRT	SHANK1
CCDC6	PANK1	UBR1	CLSTN3
METAP1	PANK1	BBS12	FBXL16
STARD3	FGFBP3	IKZF4	EPB41L1
ZNF274	TM9SF3	GPCPD1	NEBL
PCDHGA11	TM9SF3	RC3H1	SPOCK3
RBL1	ERLIN1	PNMA2	PNMA6A
TRDMT1	ITPRIP	ZBTB7A	ST18
PIP4P2	ABLIM1	RSBN1	OR2L8
SCP2	ABLIM1	FBXL13	DGKE
TMEM170A	ABLIM1	TMED8	BRSK1
MYO9A	ATE1	WIZ	CHGB
TNFRSF10D	ZMYND11	CEBPG	CNDP1
CREG2	ZMYND11	N4BP2	MAP1A
HDAC2	ZMYND11	CDADC1	RUNDC3A
BCORL1	ZMYND11	HDLBP	ACTL6B
MYBBP1A	ZMYND11	FDFT1	GPR83
SLAIN2	VIM	ARID1A	PSG1
SLC25A21	VIM	CHRFAM7A	NRSN1
MAP4	STAM	SAP30	TLL2
ACTR3C	RAB18	MAPRE1	ADAP1
METTL17	RAB18	AP5M1	NCS1
SYT16	RAB18	GATAD2B	GABBR1
MAGEA3	RAB18	ATL3	C1QL2
GKN2	ZNF33A	SLC35D1	BIN1
FAM117B	TIMM23	PXMP4	RBFOX3
AKR1B10	REEP3	DPY19L1	PPP3CA
COL12A1	DDX21	DST	PRKCB
CPSF6	VPS26A	PARD3B	OR2L13
MAGEA6	VPS26A	DCLK3	BSN
FAM210A	VPS26A	PCNX	RAB15
CD200	MINPP1	RPS6KA3	SH2D5
MTO1	HELLS	MGA	ATP1B1
NLGN4X	HELLS	NPR3	SVOP
CSMD3	HELLS	TNRC6C	CAMKK2
MAGI1	HELLS	CCNL1	HMGCLL1
AMN1	HELLS	LAMC1	PRKCE
GPBP1L1	CCNJ	FBXO34	CNTN2
ARCN1	CCNJ	GPR141	OR2L3
PLSCR1	LCOR	KPNA1	CORO6
CCNL1	LCOR	TBX18	MOAP1
CLVS2	LCOR	FNIP2	LYNX1
DCUN1D2	LCOR	SOX5	CD8B2
MCFD2	LCOR	PURB	CSDC2
EXOC5	ENTPD7	CLMN	AKR1E2
PDSS2	SCD	KDM5A	LZTS3
WDR3	SCD	DCAF17	HAS1
FAM24B	SHOC2	YLPM1	CAMK2B
PRKCE	SHOC2	VANGL2	BHLHE22
PRPS1	SHOC2	LMBRD2	SMIM22
CGGBP1	TCF7L2	MEMO1	KIF5C
PPP2CA	ATRNL1	MSL2	ALDOC
NEMP2	ATRNL1	CUL3	SYP
SMAD7	BAG3	NEBL	GLUD2
ICE2	PLEKHA1	CDH2	FAM131C
RGMB	PLEKHA1	SH3PXD2A	IQSEC2
GOLGB1	BUB3	NAV3	NGB
VAPA	BUB3	MORC3	BRSK2
NR5A2	IGF2	ZNF638	MYO15A
ANAPC1	AC132217.2	TNPO2	DIRAS2
GPR88	RIC3	KLHL6	MARCHF11
BICD2	TMEM41B	NHS	CCDC85A
ZZZ3	TMEM41B	ANKRD52	MAL2
CCDC50	RNF141	CDYL2	PPIP5K1
MMP16	RNF141	NACC1	CFAP299
ARHGAP26	SLC1A2	SPRED3	PDE1A
DYRK1A	SLC1A2	MINA	HDAC11
MATN1	SLC1A2	MEX3A	SNAP25
ALG10B	SLC1A2	MED13	PRSS16
AKT1S1	SLC1A2	SEC22C	KCNN1
FGD6	SLC1A2	TTC4	CYFIP2
ZNF106	TP53I11	TMEM135	CEND1
YBX1	ARHGAP1	STX6	MFSD4A
HUS1	FADS1	ZFR	RAPGEFL1
AMD1	FADS1	ARSB	GRIN2C
LSM8	HNRNPUL2	PHF14	NPTX1
SLC46A1	ATL3	NABP1	NRIP3
SDE2	ATL3	NEO1	LINGO2
CBX5	FOSL1	PRDM16	PITPNM3
UBE2D4	EIF1AD	FAM210A	FGF17
KIF21B	CHKA	MARCKS	SMPD3
AKR1B15	KMT5B	POLR1C	CDKL5
VAV2	KMT5B	TMEM106B	FBXW7
RALGPS2	PGM2L1	MREG	ZNF385B
TMEM106B	PGM2L1	TRPA1	RTN2
HLTF	PGM2L1	RERE	MAP3K10
DCAF12	XRRA1	STT3A	CACNA1F
PARP11	PRCP	MSH6	SMIM10L2A
LRRC57	CREBZF	ABCG8	TMEM235
PTP4A2	CREBZF	FZD5	EPHA10
C8orf34	CREBZF	PPM1H	SULT1A2
NAB1	CTSC	GFRA1	PHF24
MAP6D1	CTSC	PRPF40A	RELN
GPBP1	CTSC	LNPEP	SLC31A2
GPR180	SESN3	HSBP1	GJB6
ST6GAL2	SESN3	TTC28	MYRIP
SDHD	PGR	TRIP4	ASRGL1
ZFP91	PGR	TTLL7	GPRASP1
ERC1	PGR	NLK	NINJ2
SMG1	PGR	RPAP2	AP3B2
SP4	GUCY1A2	FAM204A	TRPM6
FBXO42	RDX	PSMD1	LCNL1
FASTKD1	RDX	SURF2	NPHS1
LIPI	RDX	ZNF843	PRKCZ
GSTCD	PPP2R1B	CADM1	GRAMD1B
SEMA3A	PPP2R1B	ARL3	PNCK
XCL2	ZBTB44	LRRC4C	FBXO2
DCUN1D4	ZBTB44	EIF2B3	DNAJA4
CCNG2	ZBTB44	RBMS2	KIAA0319
PRKAA2	ZBTB44	LRP8	DMTN
GSPT1	ZBTB44	GRIN2A	CYP4Z1
IMPAD1	ZBTB44	MARC1	FRMPD2
XPO4	SNX19	IL1RAPL1	GABRD
SCAI	RIC8A	RGS7BP	FGF22
RRS1	TIMM10B		FBXO44
UNC5D	TEAD1		PEX5L
VWA2	TEAD1		ASPG
ZNF587	TEAD1		PANX2
COPS4	TEAD1		AJM1
APPL1	TEAD1		CPNE6
KALRN	TEAD1		ENPP2
DNMBP	TEAD1		BAIAP2L2
ATXN7L3	PRRG4		SLCO3A1
SYNC	CD44		CELF4
KIAA1191	CD44		SLC26A8
BAHD1	CD44		CYP2E1
IDI1	TRIM44		LONRF2
NT5DC3	LDLRAD3		ZNF536
TNFRSF11B	API5		PLCXD3
CHSY3	CRY2		USP17L1
TP53INP1	CRY2		RBP3
GTF3C3	CRY2		PPP1R14A
SYS1	ZFP91		PRKCG
NPAP1	ZFP91		INPP5A
RINL	ZFP91		GALNTL6
HDDC3	RTN3		SFTPC
CD200R1	MARK2		USP2
ZNF704	MARK2		RTN1
TIMM23B	PPP6R3		PHYHIP
FCHSD1	PPP6R3		UNC13C
KDM3A	PPME1		SSTR2
MRPS11	ENDOD1		SLC7A4
ESRRG	JRKL		MAL
ENTPD1	JRKL		CYP1A1
DCLRE1C	JRKL		LCN15
GNAI1	SIK2		CALM3
UPB1	SIK2		CLCN4
SHC4	SIK2		WSCD2
MPP6	DIXDC1		XKR7
ZNF365	DIXDC1		ABCA10
DDX60L	NKAPD1		GFY
PRPF38B	SDHD		FAIM2
ITCH	CBL		AJAP1
DIO2	CBL		SLC7A14
LRRC18	CBL		ELOVL7
RBPJ	CBL		GRM1
TMEM170B	FLI1		CACNA2D2
ETV6	FLI1		ATP7B
OPRK1	APLP2		PCSK6
PARP8	KDM5A		KIF5A
KDM7A	KDM5A		TMEM63C
UBE2D2	KDM5A		BMP3
TBX18	SLC2A3		SRRM4
CFAP65	SLC2A3		MATK
SLC23A3	SLC2A3		CRH
EGLN1	WBP11		MKX
ZNF207	SOX5		SLC5A11
THAP6	SOX5		SCN2B
CD44	BCAT1		CACNG2
TRMT2B	BCAT1		KLK6
ABCA13	BCAT1		SPNS2
PLCXD2	IPO8		INA
EN2	IPO8		ITPR1
ZKSCAN1	IPO8		PPFIA4
ZNF678	IPO8		ABCA6
2025-09-07	CCNT1		RPRML
BHLHB9	CCNT1		CFAP74
ARMCX1	CCNT1		QDPR
LMOD2	CCNT1		SHANK2
FOXO1	ARF3		LOXHD1
FBN1	KMT2D		CALHM1
SRGAP2B	KMT2D		GSTM5
HAUS5	SLC11A2		SLC22A6
COA1	SLC11A2		NEUROD6
WDR12	SLC11A2		WNT8A
TMTC1	SLC11A2		ACTR3C
HIPK1	KRT80		TPSD1
ABCE1	KRT80		DOC2B
ANK3	KRT80		MAP7D2
C5orf24	CBX5		VWA7
NEK6	CBX5		ACTA1
PLA2G12A	CBX5		CACNA1E
CDYL2	CBX5		FAAH
HNRNPH2	RNF41		GREM1
FBXO30	ANKRD52		AMER3
CBL	BAZ2A		FNDC5
CRBN	BAZ2A		AACS
CDK8	BAZ2A		PDE1B
PLXNA1	ZBTB39		CRHR1
GRIN2A	ZBTB39		STXBP5L
PAPOLA	DDIT3		LRP2
SIGLEC6	CDK4		INPP5J
PCDHB5	GNS		ASIC2
SMARCC1	ZFC3H1		CEP170B
PPP1R9B	ZFC3H1		PDXP
RABGAP1L	ZFC3H1		PLIN5
SLC2A14	ZFC3H1		CRLF1
NUFIP2	OSBPL8		PNMA8B
TNFAIP8L1	ATP2B1		CACNA2D3
RIC8A	LTA4H		SH3PXD2A
APBB2	CDK17		KCNJ3
CCNT1	ARL1		KCNJ11
BRF1	NFYB		SEMA4F
GLRA3	TBX3		KHDRBS2
FAT3	TRIAP1		PCLO
ZNF614	SPPL3		HPCAL1
FAM122C	CAMKK2		F7
OPN3	MPHOSPH9		NSG1
KIAA0586	NCOR2		SERPINI1
GOLGA8A	POLE		EPB41L3
SLC2A3	ERC1		RFPL2
ZKSCAN4	ERC1		HLF
SLC24A4	ADIPOR2		OR3A2
DTL	GABARAPL1		EIF4E1B
SLC39A11	GABARAPL1		NMNAT2
TTC9	CREBL2		HS3ST4
ZNF827	PDE3A		RGPD8
KCNT2	PDE3A		LRRC73
KNOP1	PDE3A		C17orf107
LAMTOR3	ETNK1		CNNM1
POLR1B	ETNK1		CNTN6
SPOP	ETNK1		CDKN2D
WDR5B	ETNK1		KLHL1
IQCB1	CCDC91		RGPD3
ZFP14	CCDC91		NUAK1
PTGER3	CCDC91		KSR2
NTRK2	SPATS2		BCAS1
CHMP5	SPATS2		MAP3K21
HORMAD2	TMBIM6		SLC45A4
ELP1	DIP2B		RAP1GAP2
KHNYN	EIF4B		CALB2
UGT2A3	SP1		THEM5
RPGRIP1L	SP1		HCN2
ADAM18	SP1		RSPO2
PPP1R3A	RAB5B		MYO1D
NRK	INHBE		TMEM144
SOCS5	SRGAP1		LGI3
TWISTNB	DYRK2		SNTG2
SOCS6	DYRK2		TCTE1
ARHGAP42	DYRK2		SPINT2
GPX5	DYRK2		SLC8A2
SLC11A2	RAP1B		ANKRD65
UGT2B10	RAP1B		UNC5A
LDAH	SLC35E3		PYDC1
TMEM241	RAB21		GLT1D1
ZNF845	TBC1D15		SNPH
F11R	TBC1D15		ATP8A2
PIAS2	TBC1D15		HSF4
CC2D2B	TBC1D15		TESPA1
DCUN1D1	ATXN7L3B		CAMSAP3
C9orf72	ATXN7L3B		DAAM2
CHAF1B	ZDHHC17		PLPPR3
MAP3K1	TMTC3		KIF1A
SH3KBP1	METAP2		ZFR2
TPM3	DRAM1		DMBT1
ALPK1	TDG		HID1
GYPE	MLEC		CACNA1I
TM9SF3	MLEC		S100A1
DAG1	TMED2		ZNF488
MAGEB10	ZNF664		GPR22
PDIK1L	ZNF664		SCN4B
C7orf43	SLC7A1		GPR68
TBL1XR1	SLC7A1		SLC35F3
CA8	KATNAL1		EPHA6
CD93	KATNAL1		MYT1L
KRTAP2-3	KATNAL1		DDN
GALC	ELF1		CKMT1B
TAF8	TPT1		ABRA
ZBTB6	HTR2A		SEMA6B
INTS14	KLF12		DNAAF1
CEP70	KLF12		CDH22
UCHL5	KLF12		TNFSF9
MARCKS	KLF12		OLFM3
USP48	KLF12		TNNT1
ZKSCAN3	KLF12		RASGRF2
HRASLS5	KCTD12		PPP4R4
ATP2B1	KCTD12		TESC
BNIP3L	ZIC5		WNT10B
GBP4	ZIC5		STAT4
C5orf22	CDK8		VIP
NLK	PAN3		NECAB1
BBIP1	PAN3		FABP3
IL17A	PAN3		CHN1
MCM4	NHLRC3		KCNAB1
ZNF451	NUDT15		FTCD
PCSK6	NUDT15		OPRM1
ZEB1	NUDT15		OLFM1
PAN3	FNDC3A		FNDC10
CENPJ	ALG11		DKK2
MS4A12	UTP14C		CHRNA2
PRIMPOL	GPR180		VSNL1
TRPA1	GPR180		SH3GL2
NSL1	GPR180		MAP6D1
TAF15	GPR180		FBXO27
SUB1	GPR180		EEF1A2
HACD2	MBNL2		SERPINA10
PCNX1	MBNL2		NEUROD2
SUCLG2	RAP2A		PEBP4
C2orf49	RAP2A		SYN3
WDR41	COL4A2		PSD
MBNL2	ATP11A		ATP2B2
KLHL31	MCF2L		HS6ST3
RPL36A-HNRNPH2	MCF2L		C1QTNF4
KCNAB1	CUL4A		SLC16A8
PLCB1	CUL4A		HPCAL4
GTF2I	RBM23		BEX5
M6PR	HEATR5A		FUT1
SULF1	AL139353.1		GLB1L3
MORC3	HEATR5A		SSTR4
	AL139353.1		CCKBR
	ERO1A		MAG
	DDHD1		GPR61
	DDHD1		ZNF541
	EXOC5		KIAA1549L
	EXOC5		GJD2
	EXOC5		FAM153B
	EXOC5		RNF208
	EXOC5		FAM124A
	SIX4		CDH18
	MIDEAS		ADPRHL1
	MIDEAS		FAM160A1
	MIDEAS		HSD11B1
	AREL1		OR2L5
	TMED8		SULT4A1
	TMED8		IL34
	TMED8		GPIHBP1
	TMED8		PLPP2
	TMED8		SNURF
	DIO2		AK5
	DIO2		UNC13A
	DIO2		NPFFR1
	SEL1L		PGPEP1L
	GALC		CLIC5
	FOXN3		ADARB2
	FOXN3		TRPV5
	FOXN3		RTBDN
	FOXN3		STXBP5
	PSME1		SLC22A14
	KHNYN		ELMO1
	KHNYN		ATP6V1FNB
	PSMA6		DUSP2
	AL121594.1		CACNA1A
	STYX		NRG3
	STYX		CLDN11
	MAPK1IP1L		PTPRN
	MAPK1IP1L		GRIN2A
	MAPK1IP1L		CCDC70
	MAPK1IP1L		CAMK2A
	FBXO34		MCTP1
	AP5M1		PRMT8
	AP5M1		LRRC7
	ACTR10		FRMPD4
	PPM1A		CALY
	PPM1A		RASD2
	PPM1A		SCN3B
	PRKCH		MGAT3
	PRKCH		HPN
	ZBTB1		CACNA1B
	ZBTB1		PPP1R13B
	HSPA2		FADS6
	HSPA2		BPIFB1
	EIF2S1		PCBP3
	EIF2S1		ALOX12B
	EIF2S1		EVPL
	PCNX1		PLEKHG5
	PCNX1		KCNH1
	PCNX1		CAMK1D
	FCF1		SPATA19
	DLST		CCDC177
	DLST		ABLIM2
	CALM1		PLEKHH1
	CALM1		NEFH
	PAPOLA		MRGPRE
	PAPOLA		EPB41L4B
	PAPOLA		SLC5A8
	GABRB3		TAGLN3
	ZNF106		BEGAIN
	ZNF106		TUBB4A
	ZNF106		CDYL2
	ZNF106		PSG5
	LRRC57		SLC2A4
	LRRC57		VSTM2L
	LRRC57		SYN2
	UBR1		ALDH1A1
	UBR1		TMEM38A
	UBR1		ENPP4
	UBR1		COL10A1
	UBR1		CYGB
	UBR1		RAB26
	SLC30A4		TCERG1L
	SLC30A4		ELAPOR1
	SLC30A4		NSG2
	SLC30A4		CACNA1C
	SECISBP2L		EPOP
	DMXL2		EFHD1
	DMXL2		ADARB1
	DMXL2		NDRG2
	DMXL2		SYN1
	ARPP19		ERICH5
	CIAO2A		KCNC1
	CSNK1G1		CORO2A
	PCLAF		TUNAR
	PCLAF		SH3GL3
	INTS14		C3orf80
	INTS14		SEPTIN3
	MYO9A		IL1RL2
	MYO9A		PLCL1
	MYO9A		SOX7
	MYO9A		SLC6A7
	MYO9A		OTOF
	MYO9A		OR7A5
	PEAK1		PIK3C2G
	PEAK1		PSG2
	TBC1D2B		NTNG2
	MESD		JAKMIP1
	NTRK3		TUBA4A
	NTRK3		SLC4A10
	NTRK3		CHRM4
	NTRK3		PPM1H
	NTRK3		PRKAG2
	NTRK3		ABCC8
	NTRK3		EPN3
	NTRK3		CLEC2L
	NTRK3		GNAO1
	HDDC3		CUX2
	SELENOS		ACBD7
	SELENOS		ANKS4B
	NIPA1		ABLIM3
	MGA		ATP1A3
	MGA		CCBE1
	HACD3		PDE2A
	HACD3		SLC17A6
	HACD3		TINAG
	HACD3		DYNC1I1
	RAB11A		CA4
	RAB11A		RYR2
	RAB11A		GABARAPL1
	SMAD3		CLDN10
	SMAD3		PBOV1
	ZFAND6		OR13J1
	CEMIP		SYCE1
	CEMIP		TEF
	TICRR		CD22
	IQGAP1		MPO
	IQGAP1		PRR18
	MAN2A2		EHD3
	MAN2A2		MAGEE1
	MEF2A		S1PR5
	LITAF		SFTPA2
	SMG1		KCNA1
	SMG1		PNMA5
	SMG1		VSTM2B
	SMG1		SGSM1
	KNOP1		CAMK1G
	KNOP1		TMEM35A
	KNOP1		CERCAM
	NDUFAB1		HRH2
	DCTPP1		KIF2B
	SEPHS2		C1orf115
	VPS35		PLK5
	BRD7		MCF2L2
	BRD7		FA2H
	BRD7		CHD5
	PHLPP2		IDS
	AP1G1		SCARA5
	CDYL2		BHLHA9
	MPHOSPH6		PGBD5
	MBTPS1		KLK7
	ZDHHC7		TMEM59L
	RAB11FIP3		CAMK2G
	ZNF263		FAM83H
	ZNF263		PIP4K2A
	UBN1		SERTM1
	UBN1		PCP4
	UBN1		TNFRSF25
	C16orf72		KLHL3
	C16orf72		SCGB3A1
	RMI2		IGFL3
	COQ7		SLC22A9
	COQ7		SLC22A25
	ITPRIPL2		C8orf34
	ITPRIPL2		GABRA5
	ITPRIPL2		NIPAL3
	TMC5		PTGFR
	TMC5		DEGS2
	EEF2K		NEFL
	EEF2K		SNCB
	EEF2K		DLGAP2
	HS3ST2		KIFC2
	HS3ST2		PAQR6
	UBFD1		GABRG2
	RBBP6		SCN2A
	ORC6		LGI1
	LONP2		GABRA4
	TENT4B		NGEF
	TENT4B		KCNB1
	ARL2BP		KIRREL3
	CCL22		SSTR3
	GINS3		NKAIN2
	C16orf70		ATP2B3
	E2F4		MAST1
	SNTB2		MAS1
	SNTB2		ANK1
	CYB5B		ITPKA
	CYB5B		CPLX1
	SF3B3		RASAL1
	VPS53		FAM71E1
	VPS53		DOCK5
	VPS53		KCTD16
	VPS53		CNTN4
	VPS53		OR13C5
	VPS53		ADRA2A
	MNT		NIPAL1
	DVL2		CNGB1
	DVL2		CCDC158
	GAS7		CADPS2
	GAS7		PKP2
	GAS7		ENHO
	USP22		MPP7
	NUFIP2		RCAN2
	NUFIP2		TSPAN19
	SSH2		KIF25
	STAT5B		RBP4
	STAT5B		SV2B
	CAVIN1		IL1RAPL2
	PLEKHH3		STXBP6
	EZH1		SYNDIG1L
	BECN1		DACH2
	BECN1		COL26A1
	BECN1		NRG4
	LSM12		MAST3
	ATXN7L3		OR10A2
	CCDC43		TAFA4
	CCDC43		EPHB6
	HOXB5		RNF43
	ZNF652		MYOCD
	ZNF652		ABCA5
	ZNF652		TRIM54
	MBTD1		MRAP2
	MBTD1		RBP7
	MBTD1		SPDEF
	TRIM37		SLC22A7
	MED13		MGAT4C
	CYB561		ANKRD24
	CCDC47		SEMA4A
	PECAM1		LBHD2
	H3-3B		IP6K3
	TRIM65		NHSL2
	ACOX1		CAMKV
	ACOX1		NHLH2
	ACOX1		GPC5
	ACOX1		TCEAL6
	SRP68		KCNK4
	SRP68		UTS2R
	SRP68		FAM47A
	SRSF2		ST6GALNAC1
	SOCS3		SLC25A41
	NPLOC4		IQANK1
	NPLOC4		SEPTIN12
	NPLOC4		PRR36
	NPLOC4		FAM153A
	NPLOC4		CYS1
	PAFAH1B1		CFC1
	SLC2A4		PACSIN1
	KDM6B		LPAR3
	HS3ST3B1		ANXA8L1
	HS3ST3B1		PRKAR1B
	TVP23B		NELL1
	TVP23B		CLUL1
	NLK		NAP1L2
	TAOK1		OR2AK2
	SUZ12		RAB33A
	ZNF207		TMEM211
	PSMD11		SLC6A17
	LIG3		CHRD
	TAF15		MT1A
	PSME3		SPRN
	TMUB2		GAS2
	NMT1		CALB1
	NMT1		FSTL4
	PNPO		RASSF7
	PNPO		NBL1
	PNPO		ANKRD34A
	NFE2L1		TPBGL
	IGF2BP1		NEFM
	IGF2BP1		AMY2A
	STXBP4		L1CAM
	STXBP4		MT1G
	HLF		AGBL4
	HLF		ELAVL2
	HLF		SH3TC2
	PRKAR1A		PLIN1
	PRKAR1A		OVOL2
	PRKAR1A		NTSR2
	UNK		PTK2B
	TNRC6C		MYORG
	GAA		GREM2
	EPB41L3		RBBP8NL
	PPP4R1		GPR15
	ZNF521		HSD3B1
	SS18		PKLR
	AQP4		PRKAR2B
	AQP4		SLCO1A2
	AQP4		HSPB3
	AQP4		GCNT4
	HDHD2		CIDEA
	AC012254.2		WNT1
	IER3IP1		PVALEF
	IER3IP1		C1QL3
	SMAD7		RASGEF1A
	TCF4		SYT7
	ATP8B1		NMUR2
	ATP8B1		CD55
	BCL2		ST8SIA3
	BCL2		NDST4
	BCL2		CD200
	TMX3		DNM1
	TMX3		CD164L2
	MBP		RTN4RL1
	MBP		SYNGR3
	MBP		GALNT9
	MBP		DOCK3
	MYL12A		EFNA3
	TGIF1		FGF5
	MTCL1		SH3BGRL2
	TWSG1		GABRA1
	CHMP1B		USP43
	LDLRAD4		PSG4
	LDLRAD4		SEMA3G
	LDLRAD4		ZNF215
	LDLRAD4		GALNT14
	RNMT		MPPED1
	RNMT		PTPRR
	MAPRE2		SOWAHB
	GALNT1		TMEM130
	ELP2		SYT5
	ELP2		C10orf82
	ONECUT2		ARHGDIG
	ONECUT2		SLC24A4
	ONECUT2		KCNS2
	ONECUT2		ADCY5
	RELCH		CRTAC1
	RELCH		TSPOAP1
	SERPINB8		KCNH3
	DOK6		LRTM2
	DOK6		PSG9
	DOK6		SYT1
	DOK6		CRHR2
	SOCS6		SLC22A24
	SOCS6		CNKSR2
	SOCS6		GPAT3
	LMNB2		CDH12
	ZBTB7A		GPR143
	ZBTB7A		RUNX1T1
	MLLT1		PARM1
	INSR		LRRC26
	RAB3D		FAM180B
	TNPO2		PLA2G3
	DDX39A		STOX1
	CHERP		KEL
	LSM4		DAW1
	ZNF260		FAM71C
	AKT2		KCNK10
	AKT2		GPR149
	AKT2		PTPRT
	ZC3H4		PTPN20
	ZC3H4		CDH8
	ZC3H4		CACNB4
	ZNF28		LPO
	ZNF417		CACNA1S
	ZNF417		RNF212
	ZNF417		ATP8A1
	ZNF417		ACVR1C
	CNN2		ARFGEF3
	DAZAP1		TMEM200B
	OAZ1		SLC45A3
	CHAF1A		CLCNKB
	FEM1A		CAMK4
	FEM1A		RTL4
	KDM4B		NPAS1
	HNRNPM		BARX2
	ZNF317		UNC79
	ZNF317		SFTPD
	CALR		HOMER1
	NACC1		NDRG4
	TPM4		RIMBP2
	RAB8A		ACTRT3
	RAB8A		HTR6
	ZNF714		GRB7
	ZNF714		CRACDL
	ZNF714		NR4A2
	NUDT19		CRYGN
	GRAMD1A		EMX1
	ZNF146		AMER2
	ZNF146		STMN2
	SIPA1L3		EXTL1
	SAMD4B		PDE4C
	CIC		HCN1
	SELENOW		KRT83
	ZNF264		LINC00514
	ZNF264		CYP46A1
	ZNF264		TBR1
	ZNF264		DISP2
	ZNF805		NAP1L5
	ZNF805		PNMA6F
	ZNF304		LCN10
	ZNF304		BMP6
	PDIA6		SLC22A10
	ATAD2B		SLC25A48
	ATAD2B		PROP1
	FEZ2		NPPC
	FEZ2		CAP2
	SLC8A1		FABP6
	ZFP36L2		NKX2-8
	PIGF		HTR2A
	MCFD2		PWWP3B
	MCFD2		SV2C
	MCFD2		MARCHF4
	XPO1		IQCJ-SCHIP1
	XPO1		PRDM8
	XPO1		SLC5A4
	XPO1		LLCFC1
	XPO1		KCNK1
	RAB1A		SLC22A8
	RAB1A		PAX7
	PPP3R1		ANK3
	AAK1		CD300LG
	AAK1		NPTXR
	AAK1		HBA1
	AAK1		FGF13
	AAK1		RPS6KA6
	AAK1		TLCD3B
	AAK1		KNDC1
	TIA1		NRG1
	TIA1		KCNJ6
	TIA1		PPP3R2
	ZNF514		TNFRSF18
	ZNF514		CDK18
	MGAT4A		KLK5
	LONRF2		DLGAP1
	LONRF2		LRFN2
	LONRF2		ASTL
	AMMECR1L		ACSL6
	AMMECR1L		CFAP46
	DARS1		RAB6B
	ORC4		GDAP1L1
	ORC4		SYT3
	RND3		GLRA3
	RND3		SLC9A2
	NCKAP1		KCNIP2
	NCKAP1		SYNPR
	NCKAP1		ADRB3
	STK17B		TMEM266
	TRAK2		CYP7B1
	INO80D		FAM241B
	INO80D		LRTM1
	INO80D		JPH4
	METTL21A		TAFA1
	METTL21A		CACNG3
	FN1		ANKRD33B
	USP37		GRIN1
	USP37		HTR3B
	USP37		CNTN5
	USP37		NRGN
	RNF144A		TMEM275
	RNF144A		ZCCHC12
	HADHB		SSTR1
	SELENOI		KCNJ4
	SELENOI		ANKRD30B
	SELENOI		ADRA1A
	SELENOI		KRTAP5-1
	PPP1CB		PRPH2
	CRIM1		NPY
	EML4		SEZ6L2
	EML4		ASPHD1
	EML4		PTER
	EML4		UNC80
	PPM1B		NPBWR2
	PPM1B		KLHL34
	PPM1B		SLC25A27
	PRKCE		C4orf50
	PRKCE		OPN4
	RHOQ		PDE3B
	MRPL19		PKD2L1
	KDM3A		ERC2
	KDM3A		PSG7
	KDM3A		LINC02210-CRHR1
	SOWAHC		CIT
	SOWAHC		SLC39A4
	SOWAHC		JAG2
	BCL2L11		FMN1
	BCL2L11		GOT1L1
	SLC20A1		SYT16
	STEAP3		TINAGL1
	STEAP3		SYNPO2
	STEAP3		RSPO3
	CCNT2		TTC6
	CCNT2		TTC22
	CCNT2		GALNT17
	CCNT2		TLL1
	RAB3GAP1		NLRP6
	RAB3GAP1		STPG1
	RAB3GAP1		CEP126
	UBXN4		CYP4B1
	CSRNP3		TP53TG3D
	CSRNP3		DNM3
	CSRNP3		ALS2CL
	CSRNP3		TUBA4B
	CSRNP3		WNK2
	GAD1		PLAAT5
	GAD1		HSPA12A
	DCAF17		THEMIS
	DCAF17		BASP1
	HAT1		HTR1B
	HOXD13		CALN1
	PLEKHA3		FEZF2
	ITGAV		WFDC1
	ITGAV		GLP2R
	NAB1		RTN4R
	NAB1		PSG8
	PLCL1		CRYM
	ABI2		SMIM32
	ABI2		CHRNA4
	MAP2		DMC1
	RETREG2		OR2AG1
	RETREG2		TMEM184A
	RETREG2		IL18R1
	ALPP		MMP24
	ALPP		GNG10
	SNORC		RIMS2
	GIGYF2		HCRTR2
	GIGYF2		MISP
	GPCPD1		GIPC2
	GPCPD1		SLC24A2
	GPCPD1		NECAB2
	GPCPD1		KCNK9
	CD93		ATRNL1
	CD93		DOK6
	RBM39		SLC12A3
	BLCAP		PVALB
	ELMO2		PRAMEF20
	B4GALT5		LRRC43
	SPATA2		SHISAL1
	PEDS1-UBE2V1		SYT12
	UBE2V1		RAB3C
	ATP9A		SMTNL2
	ATP9A		NEGR1
	LAMA5		GRIN3A
	NOP56		CR2
	NOP56		KCNQ4
	MAVS		GPR6
	MAVS		PRKG2
	MAVS		LY6K
	PRNP		INSM2
	PRNP		GABRB2
	POLR3F		ARID3C
	POLR3F		DGKB
	KIF3B		LAMA3
	MAPRE1		GDF2
	MAPRE1		KCNH7
	CHMP4B		CHADL
	PHF20		C12orf54
	RALGAPB		CELF5
	RALGAPB		AKAP5
	SRSF6		PNPLA5
	YWHAB		OR6A2
	YWHAB		CELF3
	YWHAB		FFAR1
	NCOA3		TAS2R40
	NCOA3		FAM163A
	ARFGEF2		C11orf87
	PTPN1		BDNF
	TFAP2C		TAMALIN
	RAB22A		C14orf180
	STX16		SMIM43
	STX16		ICAM5
	HSPA13		CACNA2D1
	HSPA13		RND1
	APP		TMEM210
	CFAP298		TMC3
	C2CD2		NOX5
	C2CD2		GNG3
	DYRK1A		C9orf24
	DYRK1A		POU6F2
	ADARB1		CADM3
	ADARB1		AMPH
	COL6A1		CYP24A1
	MAPK1		IZUMO1
	TOB2		COL21A1
	TOB2		FBXO40
	PEX26		CHRM1
	PEX26		ABCC12
	SNAP29		ETS2
	SNAP29		PRRT2
	CRKL		LHFPL1
	CRKL		LY6D
	CRKL		SLC26A9
	GRK3		SOHLH1
	GRK3		CYP11B1
	ZNRF3		PLEKHD1
	NF2		SHISA2
	NF2		SRL
	HMGXB4		ANKRD62
	TRIOBP		GRM7
	TRIOBP		MGAT5B
	TRIOBP		CDC42EP2
	TNRC6B		HPCA
	TNRC6B		LRFN5
	TNRC6B		LYPD8
	TNRC6B		KCNS1
	TNRC6B		POU2AF1
	TNRC6B		GPR37
	XPNPEP3		TH
	XPNPEP3		VSTM5
	CRBN		PALM
	ATP2B2		BEX2
	MRPS25		PNMT
	MRPS25		LEXM
	SLC4A7		SMIM24
	ZNF445		ANKRD34B
	ZNF445		CYP2C18
	ZNF445		FGF12
	ZNF445		TSPAN15
	ZNF445		CA8
	ZNF445		SLC30A3
	MAP4		KRT17
	MAP4		OR2AG2
	HYAL1		SLC6A20
	STIMATE		CLMN
	TKT		SYT13
	ADAMTS9		SVIP
	EIF4E3		IRS4
	EIF4E3		SH3RF2
	EIF4E3		ECE2
	CGGBP1		TRDN
	CGGBP1		SLC39A12
	CGGBP1		PCP4L1
	CPOX		SLC34A1
	TOMM70		MYADML2
	ABI3BP		HS3ST2
	ABI3BP		SIAH3
	CD200R1		NKX6-3
	CD200R1		SH3BP5
	CD200R1		CHST1
	NAA50		NPTX2
	NAA50		PPP1R1B
	LRRC58		ELAVL4
	LRRC58		DRGX
	LRRC58		TCN1
	GOLGB1		ANKRD63
	GOLGB1		TDRD6
	GOLGB1		MTRNR2L5
	GOLGB1		FAM163B
	GOLGB1		HTR1A
	KPNA1		SFRP5
	KPNA1		KIF19
	KPNA1		SCUBE1
	ZNF148		PGA4
	ZNF148		SST
	ZNF148		PSG6
	ZNF148		KCNQ3
	ZNF148		LDLRAP1
	ZNF148		SLC30A2
	OSBPL11		TACR2
	TMCC1		FOLH1
	NPHP3		CRHBP
	NPHP3		NUPR2
	NPHP3		EPHX4
	NPHP3		ADAMTS4
	ANAPC13		GPR26
	MSL2		ACKR1
	MSL2		KLHL30
	MSL2		PAK3
	STAG1		CSF3
	TM4SF1		SLC17A7
	PFN2		ENPP5
	MAGEF1		APOBEC3A
	FGF12		MEI4
	ATP13A3		MLXIPL
	TFRC		SLC22A11
	UBXN7		VSIG10L2
	UBXN7		GNG8
	UBXN7		PAX2
	UBXN7		CNTN3
	UBXN7		NKD2
	EDEM1		GABBR2
	EDEM1		CYP4A11
	SETD5		GNG13
	JAGN1		SERPINA6
	SLC6A6		C20orf203
	SLC6A6		KNCN
	OXNAD1		TMEM244
	OXNAD1		RXFP2
	OXNAD1		MUC5AC
	OXNAD1		SHTN1
	TGFBR2		GABRA2
	TGFBR2		BUB1B-PAK6
	TGFBR2		HEMGN
	TGFBR2		GDA
	GPD1L		SLC1A2
	GPD1L		LYPD2
	GPD1L		NOS1
	OXSR1		TRIM77
	OXSR1		CHRNA6
	OXSR1		KLK8
	ZNF621		SMPX
	ZNF621		HTR1E
	ZNF621		KCNC2
	ZNF621		OR1F1
	ZNF621		LRRC38
	ZNF621		ETNPPL
	DAG1		SPEF2
	RBM5		TDRD9
	RBM5		ZNF831
	RBM15B		FGF8
	RBM15B		HSPB7
	RBM15B		RAB37
	APPL1		PTPN5
	APPL1		MAPK15
	APPL1		GSC2
	APPL1		RNF128
	FLNB		LHX6
	RPP14		S1PR4
	HTD2		RS1
	PTPRG		GPR78
	SLC25A26		DGAT2
	KBTBD8		OCA2
	GXYLT2		GPR148
	PPP4R2		SYT14
	PPP4R2		LPA
	CADM2		FAM246A
	CADM2		WIF1
	CADM2		RIIAD1
	CADM2		ESPN
	CADM2		OPCML
	DZIP3		ALDH1A3
	DZIP3		GRM5
	DZIP3		RBM24
	PHLDB2		SNAP91
	PHLDB2		LAMC2
	PHLDB2		PRSS1
	PHLDB2		OR10A5
	PHLDB2		TEX13B
	ATP6V1A		GNAI1
	DTX3L		C7
	DTX3L		DRD5
	PARP14		FREM3
	PLXNA1		DSG1
	SRPRB		INHBA
	PXYLP1		HTR3A
	ATP1B3		TMEM178A
	RAP2B		ADAM29
	RAP2B		HTR3E
	MME		CAPSL
	MME		CCL28
	MME		OPRD1
	MME		CXCR1
	MYNN		KRT3
	MYNN		FRRS1L
	MYNN		THEG
	SEC62		NPBWR1
	SEC62		RXFP1
	SKIL		ADAMTS19
	SKIL		DUSP26
	SKIL		ANO3
	ECT2		SEC16B
	ECT2		HBA2
	ATP11B		PANX3
	ATP11B		RNF17
	KLHL24		TCEAL2
	KLHL24		SULT1A1
	KLHL24		CBLIF
	YEATS2		KCNH4
	YEATS2		C14orf132
	YEATS2		PHACTR3
	EIF4A2		RGS4
	EIF4A2		PTPRQ
	LPP		C5AR2
	LPP		FXYD4
	LPP		FGF18
	LPP		PIP
	LPP		TACR3
	LPP		USP17L4
	LPP		GADD45B
	LPP		AKR1C1
	LPP		KCNIP3
	LPP		C2CD4C
	LPP		PDE11A
	HES1		VGF
	PAK2		C4orf54
	PAK2		C2CD4D
	PAK2		PSAPL1
	SENP5		TMEM191B
	SENP5		IL1RAPL1
	LETM1		ASB4
	WDR1		TYRP1
	BOD1L1		C5orf47
	BOD1L1		RIMS1
	BOD1L1		FOSB
	BOD1L1		CXCR2
	DCAF16		TDRD5
	DCAF16		MLIP
	DHX15		CCL19
	RBM47		PDP1
	RBM47		IL20RA
	APBB2		CHGA
	APBB2		ANTXRL
	APBB2		LY6H
	APBB2		CASQ2
	COMMD8		NGF
	EPHA5		TMEFF2
	EPHA5		CCK
	EPHA5		RTN4RL2
	UBA6		RNF207
	UBA6		CNTNAP4
	CDKL2		GFRA2
	CDKL2		GNAL
	CNOT6L		TMEM229A
	HNRNPD		STUM
	HNRNPDL		ZNF208
	HNRNPDL		ADRA1B
	SEC31A		C3orf56
	WDFY3		GOLGA6L7
	WDFY3		TMPRSS13
	MAPK10		HDGFL1
	MAPK10		SFTPA1
	KLHL8		SELP
	KLHL8		OR56A1
	KLHL8
	KLHL8
	FAM13A
	FAM13A
	FAM13A
	LAMTOR3
	LAMTOR3
	LAMTOR3
	LAMTOR3
	UBE2D3
	LEF1
	PLA2G12A
	PLA2G12A
	PLA2G12A
	CAMK2D
	ANXA5
	ANXA5
	SETD7
	SETD7
	CLGN
	OTUD4
	OTUD4
	OTUD4
	OTUD4
	CBR4
	CBR4
	FBXO8
	DCTD
	SORBS2
	HTT
	HTT
	HTT
	HTT
	CPEB2
	PI4K2B
	UBE2K
	SLAIN2
	SLAIN2
	SLAIN2
	SLAIN2
	AFP
	AFP
	THAP6
	THAP6
	THAP6
	THAP6
	THAP6
	USO1
	SEPTIN11
	NPNT
	FAM241A
	USP53
	FGF2
	JADE1
	JADE1
	NAA15
	NAA15
	NAA15
	NAA15
	RAB33B
	HHIP
	HHIP
	HHIP
	HHIP
	TRIM2
	AC013477.1
	GRIA2
	PALLD
	SLC25A4
	LPCAT1
	DROSHA
	ZFR
	LMBRD2
	LMBRD2
	NADK2
	NADK2
	NUP155
	NUP155
	NUP155
	NUP155
	NUP155
	TTC33
	TTC33
	TTC33
	TTC33
	ENC1
	ENC1
	ENC1
	MTX3
	EDIL3
	EDIL3
	TMEM161B
	TMEM161B
	TMEM161B
	REEP5
	HINT1
	HINT1
	FNIP1
	FNIP1
	FNIP1
	FNIP1
	SAR1B
	SAR1B
	SAR1B
	SAR1B
	MACROH2A1
	HDAC3
	HDAC3
	HDAC3
	NR3C1
	NR3C1
	NR3C1
	YIPF5
	YIPF5
	ADAM19
	KIAA1191
	CLK4
	CLK4
	TBC1D9B
	SDHA
	MARCHF6
	MARCHF6
	OTULIN
	OTULIN
	OTULIN
	C5orf22
	NPR3
	NPR3
	NIPBL
	NIPBL
	NNT
	NNT
	ITGA2
	MTREX
	MTREX
	MTREX
	MAP3K1
	GPBP1
	TNPO1
	TNPO1
	TNPO1
	TNPO1
	TNPO1
	LNPEP
	RGMB
	RGMB
	PAM
	PAM
	MAN2A1
	PHAX
	LYRM7
	LYRM7
	LYRM7
	LYRM7
	CDC42SE2
	CDC42SE2
	RAD50
	AC116366.1
	RAD50
	AC116366.1
	RAD50
	AC116366.1
	RAD50
	AC116366.1
	C5orf24
	SMAD5
	SMAD5
	MATR3
	MATR3
	MATR3
	MATR3
	MATR3
	MATR3
	UBE2D2
	UBE2D2
	UBE2D2
	ADRB2
	GRPEL2
	SLC26A2
	SLC26A2
	SLC26A2
	SLC26A2
	SYNPO
	SYNPO
	G3BP1
	G3BP1
	G3BP1
	G3BP1
	LARP1
	GABRA1
	RARS1
	MAML1
	SERPINB9
	SLC22A23
	ATXN1
	ATXN1
	NUP153
	STK38
	STK38
	GLO1
	TBCC
	ZNF318
	ELOVL5
	GCLC
	GCLC
	DST
	DST
	DST
	DST
	DST
	DST
	DST
	DST
	DST
	COL12A1
	TENT5A
	PGM3
	RRAGD
	RRAGD
	RRAGD
	RRAGD
	MMS22L
	CD164
	HDAC2
	HDAC2
	HDAC2
	SGK1
	SGK1
	SGK1
	IFNGR1
	FBXO30
	FBXO30
	NUP43
	IRF4
	IRF4
	PRPF4B
	PRPF4B
	PRPF4B
	RREB1
	SNRNP48
	SNRNP48
	SNRNP48
	TMEM14C
	TMEM170B
	TMEM170B
	TMEM170B
	TMEM170B
	TMEM170B
	TMEM170B
	TMEM170B
	MYLIP
	RBM24
	BTN2A1
	BTN2A1
	HMGN4
	ZKSCAN8
	ZKSCAN8
	BRD2
	BRD2
	MAPK14
	MAPK14
	ZFAND3
	NFYA
	NFYA
	NFYA
	AL365205.1
	TOMM6
	TAF8
	TAF8
	TAF8
	TAF8
	TAF8
	RPL7L1
	RPL7L1
	RPL7L1
	KLHDC3
	PTP4A1
	AL135905.2
	NT5E
	NT5E
	PNRC1
	PNRC1
	AMD1
	AMD1
	AMD1
	MARCKS
	SLC35F1
	SLC35F1
	PLN
	RNF217
	RNF217
	RNF217
	CCDC28A
	CCDC28A
	CCDC28A
	STXBP5
	AKAP12
	SCAF8
	C7orf50
	ACTB
	CYTH3
	NDUFA4
	POLR1F
	POLR1F
	IGF2BP3
	IGF2BP3
	TRA2A
	HNRNPA2B1
	JAZF1
	GGCT
	VPS41
	PURB
	PURB
	PURB
	PURB
	SEC61G
	ZNF680
	YWHAG
	SEMA3D
	SEMA3D
	ELAPOR2
	ELAPOR2
	KRIT1
	CDK6
	CDK6
	CYP3A5
	CYP3A5
	CYP3A5
	CYP3A5
	CYP3A5
	TRIM4
	MAP11
	FIS1
	ATXN7L1
	ATXN7L1
	ATXN7L1
	ATXN7L1
	NAMPT
	NAMPT
	DOCK4
	SMIM30
	SMIM30
	FAM3C
	WASL
	WASL
	PODXL
	CNOT4
	CNOT4
	CNOT4
	CNOT4
	CNOT4
	MTPN
	CREB3L2
	CREB3L2
	KIAA1549
	KIAA1549
	KIAA1549
	KIAA1549
	HIPK2
	HIPK2
	HIPK2
	HIPK2
	MKRN1
	MKRN1
	BRAF
	BRAF
	KMT2C
	FOXK1
	FOXK1
	FOXK1
	RAC1
	RAC1
	C1GALT1
	C1GALT1
	C1GALT1
	TMEM106B
	TMEM106B
	TMEM106B
	TMEM106B
	TMEM106B
	ITGB8
	ITGB8
	ITGB8
	ZNRF2
	SEPTIN7
	NIPSNAP2
	CCT6A
	CCT6A
	ZNF273
	AUTS2
	AUTS2
	AUTS2
	AUTS2
	LAT2
	CD36
	DMTF1
	STEAP2
	STEAP2
	STEAP2
	STEAP2
	CLDN12
	CLDN12
	FZD1
	PEG10
	PEG10
	PEG10
	TAC1
	LMTK2
	BRI3
	ZSCAN25
	ZSCAN25
	ZKSCAN1
	ZKSCAN1
	ZKSCAN1
	ZKSCAN1
	ZKSCAN1
	ZKSCAN1
	MEPCE
	CUX1
	CUX1
	CUX1
	CUX1
	DNAJB9
	DNAJB9
	MDFIC
	MDFIC
	MDFIC
	CAV2
	CAV2
	CAV2
	CAV1
	LMOD2
	CALU
	STRIP2
	STRIP2
	NUP205
	NUP205
	NUP205
	UBN2
	UBN2
	UBN2
	ZNF783
	NOM1
	CTSB
	DLC1
	DLC1
	PSD3
	PSD3
	TNFRSF10B
	PPP2CB
	NSD3
	NSD3
	FGFR1
	FGFR1
	THAP1
	TCEA1
	BPNT2
	BPNT2
	BPNT2
	VCPIP1
	VCPIP1
	VCPIP1
	TRAM1
	RUNX1T1
	TP53INP1
	TP53INP1
	TP53INP1
	LRP12
	NUDCD1
	NUDCD1
	RAD21
	ATAD2
	KBTBD11
	KBTBD11
	TNKS
	GATA4
	FDFT1
	ZDHHC2
	SLC7A2
	SLC7A2
	SLC7A2
	SLC39A14
	SLC39A14
	C8orf58
	BNIP3L
	BNIP3L
	DPYSL2
	DPYSL2
	ERLIN2
	ERLIN2
	ERLIN2
	DDHD2
	DDHD2
	DDHD2
	MCM4
	MCM4
	MCM4
	MCM4
	UBE2V2
	SDCBP
	SDCBP
	SDCBP
	SDCBP
	RAB2A
	RRS1
	TERF1
	PI15
	PI15
	PI15
	PI15
	CPNE3
	CPNE3
	POLR2K
	GRHL2
	ATP6V1C1
	EFR3A
	PHF20L1
	PHF20L1
	PHF20L1
	CBWD1
	RFX3
	RFX3
	RFX3
	NFIB
	NFIB
	PSIP1
	ELAVL2
	DCAF12
	DCAF12
	ZBTB5
	ZBTB5
	KLF9
	C9orf40
	UBQLN1
	AGTPBP1
	AGTPBP1
	BICD2
	TMEM245
	TMEM245
	PTBP3
	RAB14
	STOM
	STOM
	RC3H2
	RC3H2
	ANGPTL2
	ANGPTL2
	NIBAN2
	FAM102A
	MED22
	VAV2
	VAV2
	VAV2
	BRD3
	UHRF2
	UHRF2
	MTAP
	UNC13B
	UNC13B
	NTRK2
	NTRK2
	NTRK2
	NTRK2
	NTRK2
	NTRK2
	NTRK2
	NTRK2
	NTRK2
	NTRK2
	NTRK2
	ANP32B
	ZNF189
	SLC44A1
	SLC44A1
	SLC44A1
	RAD23B
	RABGAP1
	NEK6
	NEK6
	GAPVD1
	GAPVD1
	ZBTB34
	ZBTB34
	RXRA
	RXRA
	EHMT1
	MID1
	MID1
	MID1
	EIF1AX
	KLHL15
	KLHL15
	KLHL15
	KLHL15
	CASK
	MAGT1
	MAGT1
	ARMCX2
	ARMCX2
	ARMCX2
	PSMD10
	ACSL4
	AMOT
[truncated: 35 more rows]
