# Supplementary material for: The Novel circRNA_0022587/miR-216a-5p/PRKCE Axis Restricts Glioblastoma (GBM) Progression
Source: Research Square preprint supplement (doi:10.21203/rs.3.rs-8275622/v1), 2025-12-11
Supplement: Supplementary file 5 [file cbc764d5552dabd6e66584cc.docx]

Supplementary Table S2. The sequences of circRNA_0022587.

| GCATCCGTGTCATTCTGGACCTTACTCCCAACTACCGGGGTGAGAACTCGTGGTTCTCCAC |
| --- |
| TCAGGTTGACACTGTGGCCACCAAGGTGAAGGCCTCAGGAAACTGGGAGA GGGGGGATC |
| TTGACTGACATTTTAGATCCTGTCTGCTGCTCACTGATTATGACTGTGGACGCGTCTCCCTGC |
| TTCTCTGGGTCTGTTTCTTCATCTCTAAAATAGGATGCTCTGGAGTTTT GGCTGCAAGCTGG |
| CGTGGATGGGTTCCAGGTTCGGGACATAGAGAATCTGAAGGATGCATCCTCATTCTTGGCT |
| GAGTGGCAAAATATCACCAAGGGCTTCAGTGAAGACAGGCTCTTGATTG CGGGGACTAACT |
| CCTCCGACCTTCAGCAGATCCTGAGCCTACTCGAATCCAACAAAGACTTGCTGTTGACTAGCT |
| CATACCTGTCTGATTCTGGTTCTACTGGGGAGCATACAAAATCCCTAGTCACACAGTATTTG |
| AATGCCACTGGCAATCGCTGGTGCAGCTGGAGTTTGTCTCAGGCAAGGCTCCTGACTTCCTTC |
| TTGCCGGCTCAACTTCTCCGACTCTACCAGCTGATGCTCTTCACCCTGCCA GGGACCCCTGTTTT |
| CAGCTACGGGGATGAGATTGGCCTGGATGCAGCTGCCCTTCC TGGACAG |
